# Supplementary material
Source: Springer Nature journal article supplement (https://www.springermedizin.de/resource/supplementary/12967_2013_1520_MOESM1_ESM.pdf/9574226)
Supplement: MOESM1 [file 9574226]

# T-cell differentiation and TREC formation

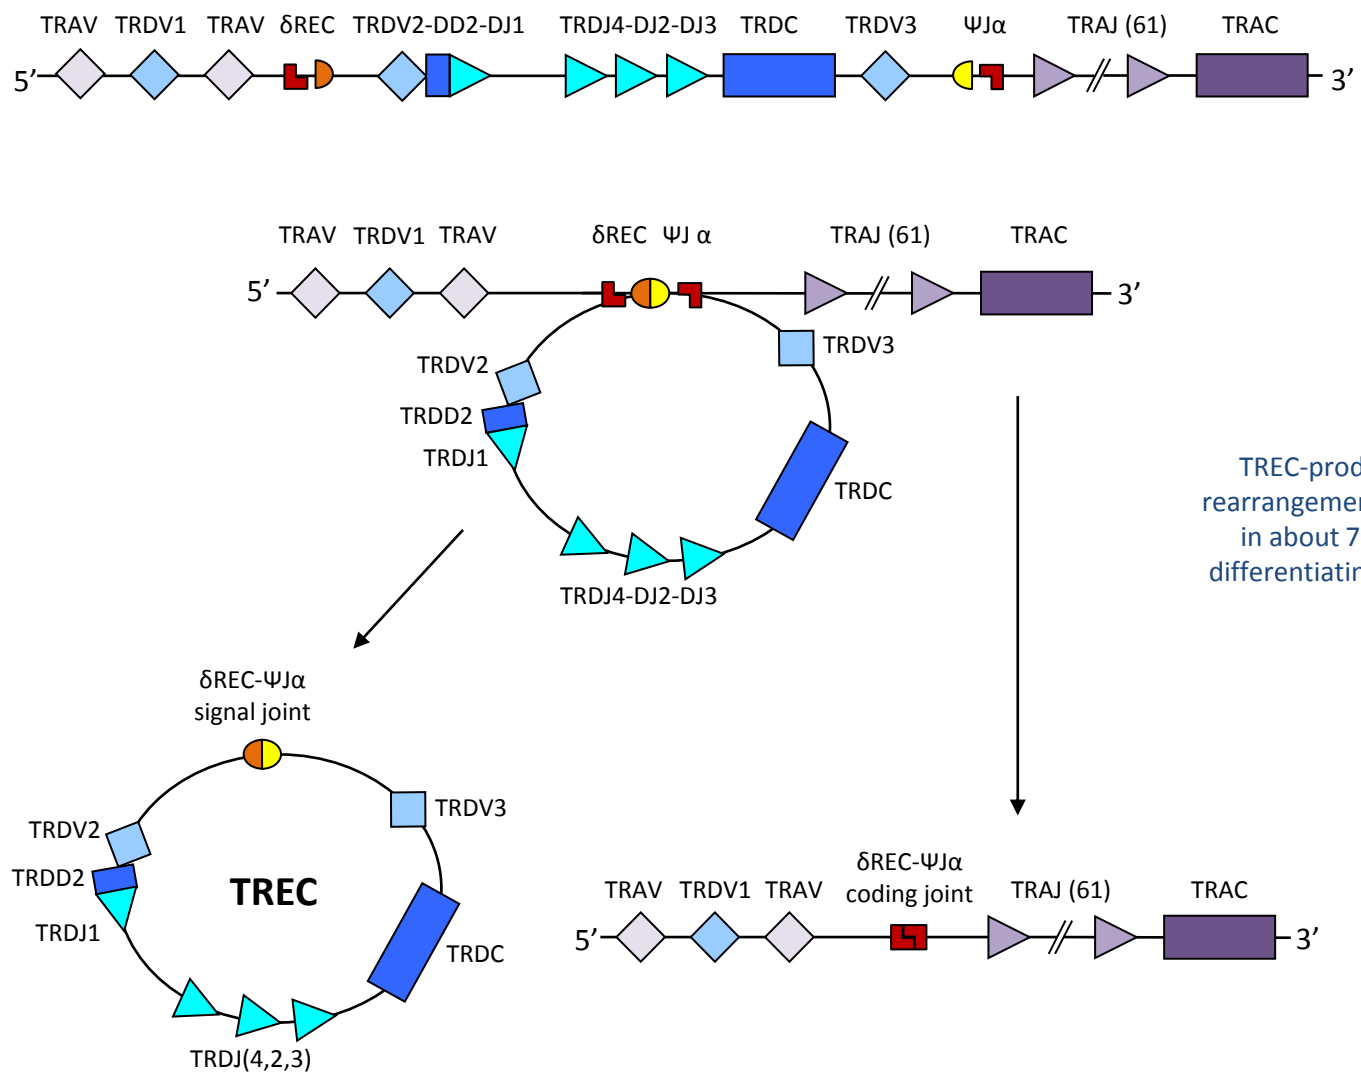

# A

## BONE MARROW

# B

# B-cell differentiation and KREC formation

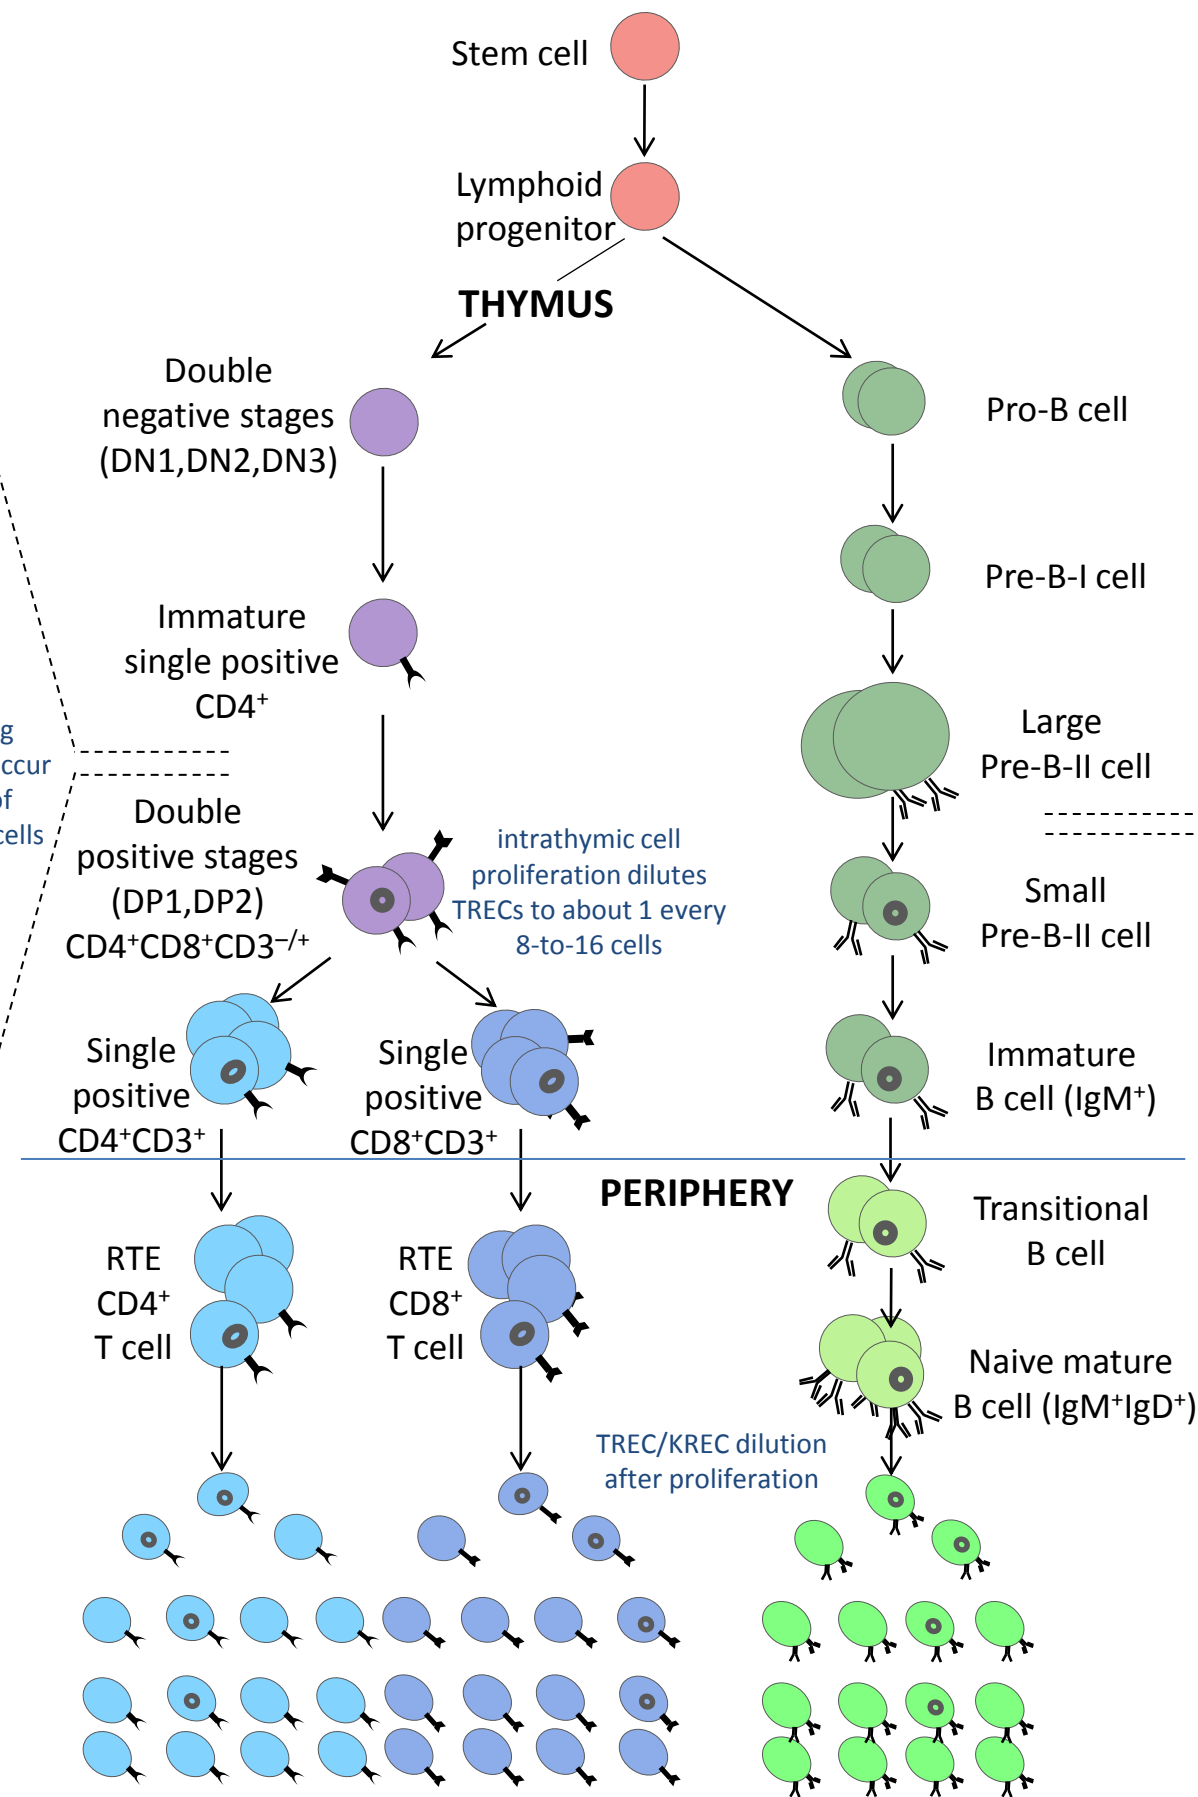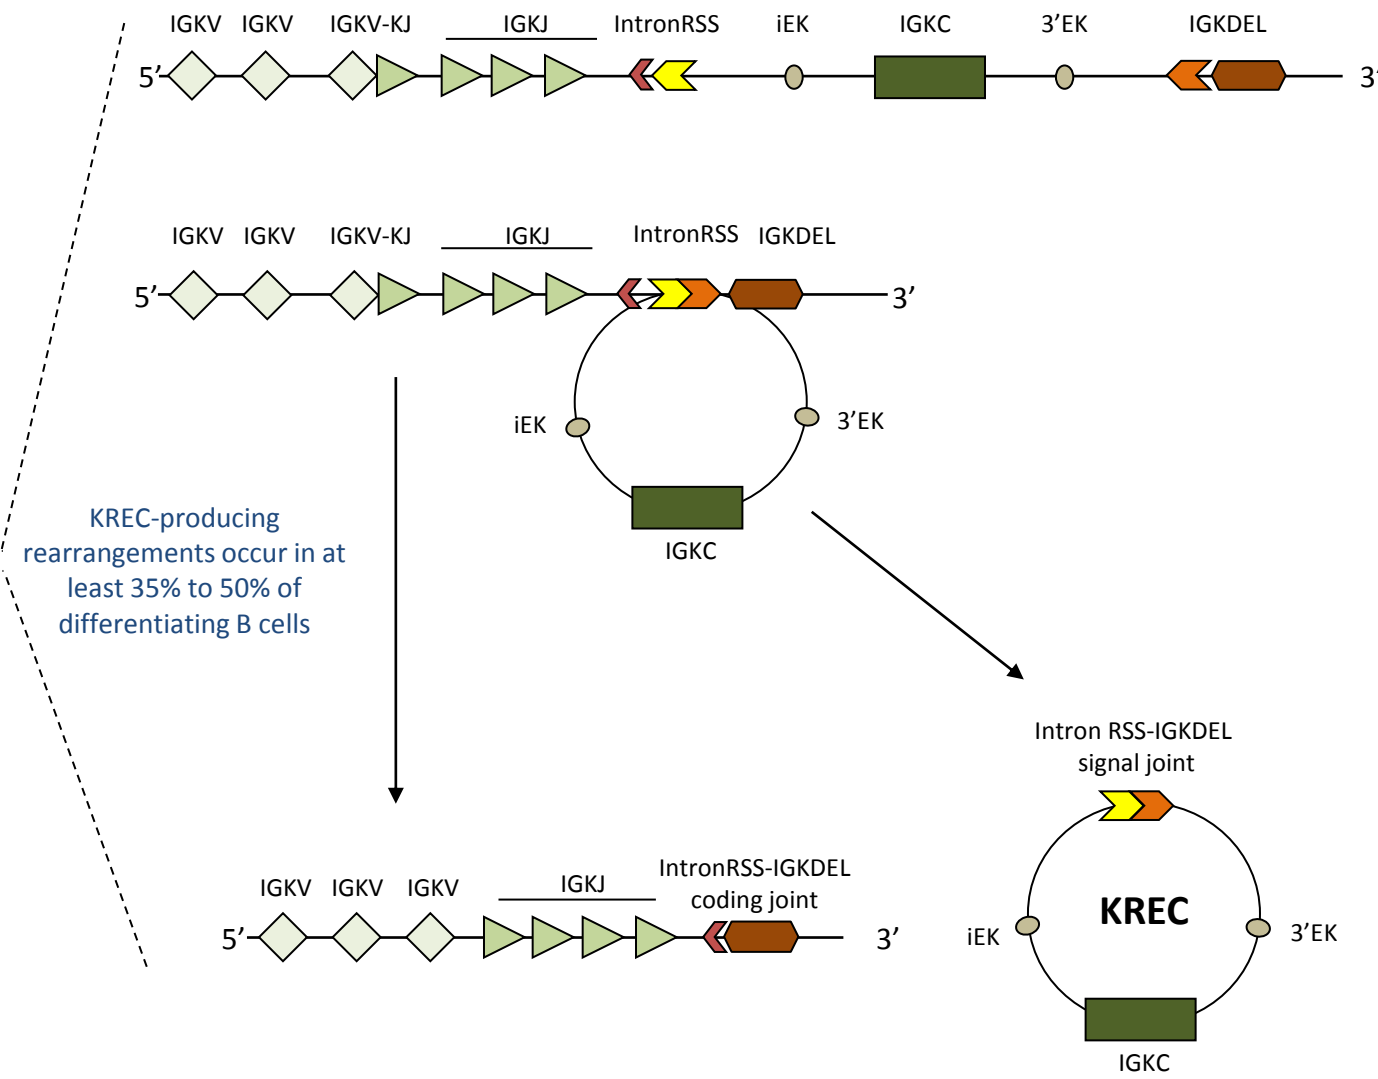

TREC-producing rearrangements occur in about 70% of differentiating T cells

KREC-producing rearrangements occur in at least 35% to 50% of differentiating B cells
